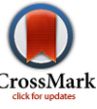

## Correction

# Correction: Factors Limiting Performance in a Multitone Intensity-Discrimination Task: Disentangling Non-Optimal Decision Weights and Increased Internal Noise

The *PLOS ONE* Staff

## Notice of Republication

This article was republished on April 14, 2014 to replace an incorrectly published version where Equations 10 and 11 were typeset incorrectly. Please download this article again to view the correct version. The originally published, uncorrected article and the republished, corrected article are provided here for reference.

## Supporting Information

**File S1.** Originally published, uncorrected article.  
(PDF)

**File S2.** Republished corrected article.  
(PDF)

## Reference

1. Oberfeld D, Kuta M, Jesteadt W (2013) Factors Limiting Performance in a Multitone Intensity-Discrimination Task: Disentangling Non-Optimal Decision Weights and Increased Internal Noise. *PLoS ONE* 8(11): e79830.

---

**Citation:** The *PLOS ONE* Staff (2014) Correction: Factors Limiting Performance in a Multitone Intensity-Discrimination Task: Disentangling Non-Optimal Decision Weights and Increased Internal Noise. *PLoS ONE* 9(5): e97209. doi:10.1371/journal.pone.0097209

**Published:** May 2, 2014

**Copyright:** © 2014 The *PLOS ONE* Staff. This is an open-access article distributed under the terms of the Creative Commons Attribution License, which permits unrestricted use, distribution, and reproduction in any medium, provided the original author and source are credited.
